# Supplementary material for: Deciphering the biology of KIR2DL3+ T lymphocytes that are associated to relapse in haploidentical HSCT
Source: PubMed Central journal article supplement (PMC8338934; doi:10.1038/s41598-021-95245-7), 2021-08-04
Supplement: 41598_2021_95245_MOESM1_ESM.pdf [file 41598_2021_95245_MOESM1_ESM.pdf]

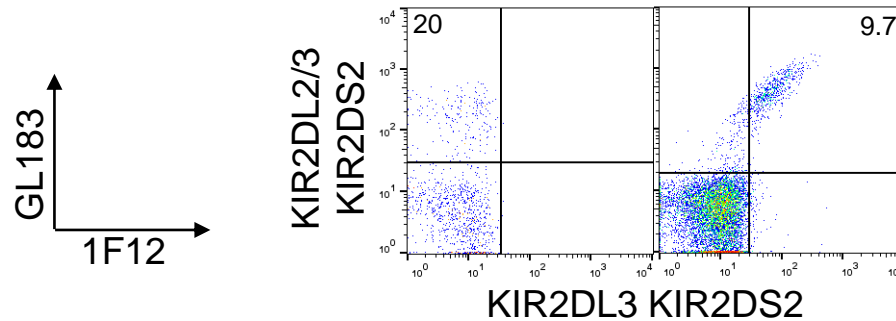

|              |   |   |
|--------------|---|---|
| Gene KIR2DS2 | + | - |
| Gene KIR2DL2 | + | - |
| Gene KIR2DL3 | - | + |

**Supplemental figure 1. KIR2DL2 expression on T lymphocytes from the unique patient receiving HSC from KIR2DS2+ KIR2DL2+ genotyped donor.** Density plot illustrating KIR2DL2 expression on T lymphocytes from the unique patient receiving HSC from KIR2DS2+ KIR2DL2+ genotyped donor. The staining was performed by flow cytometry using the combination of KIR2DL2/3/2DS2 specific GL183 and KIR2DL3/2DS2 specific 1F12mAb leading to identify KIR2DL2+ KIR2DL3/2DS2- cells in the upper left gate. The profile of one representative patient receiving KIR2DL3+ KIR2DL2/S2- genotyped HSC is shown in parallel with KIR2DL3+ cells in the upper right gate. The cell frequency is indicated.
